# Supplementary material for: First-principles calculations of strain engineering in NaYF4-based nanocrystals with hydroxyl impurities
Source: Royal Society of Chemistry journal article supplement (doi:10.1039/d1nr06904g), 2021-01-01
Supplement: d1nr06904g1.pdf [file d1nr06904g1.pdf]

**Supporting Information**

**First-principles calculations of strain engineering in NaYF<sub>4</sub>-based nanocrystals with hydroxyl impurities**

Xian Qin<sup>a,\*</sup>, Xiaogang Liu<sup>a</sup>

<sup>a</sup>Department of Chemistry, National University of Singapore, Singapore 117543, Singapore

\*E-mail: [chmqinx@nus.edu.sg](mailto:chmqinx@nus.edu.sg)

**Determination of the chemical potential range for each species.** Under thermal equilibrium growth conditions, stable cubic-phase NaYF<sub>4</sub> can form when the chemical potentials of each species follow

$$\Delta\mu_{Na} + \Delta\mu_Y + 4\Delta\mu_F = \Delta H^f(NaYF_4) \quad (S1)$$

where  $\Delta H^f(NaYF_4)$  is the formation enthalpy of cubic NaYF<sub>4</sub> obtained from first-principles calculations.  $\Delta\mu_{Na}$ ,  $\Delta\mu_Y$ , and  $\Delta\mu_F$  are the relative chemical potentials of Na, Y, and F, referenced to the energy per atom of sodium bulk, yttrium bulk, and a gas-phase fluorine diatomic molecule, respectively. These relative chemical potentials can be written as

$$\Delta\mu_{Na} = \mu_{Na} - \mu_{Na}^{Bulk} \quad (S2)$$

$$\Delta\mu_Y = \mu_Y - \mu_Y^{Bulk} \quad (S3)$$

$$\Delta\mu_F = \mu_F - \mu_F^{Gas} \quad (S4)$$

To avoid the formation of the aforementioned elemental substances, relative chemical potentials should follow

$$\Delta\mu_{Na} \leq 0 \quad (S5)$$

$$\Delta\mu_Y \leq 0 \quad (S6)$$

$$\Delta\mu_F \leq 0 \quad (S7)$$

where  $\Delta\mu = 0$  denotes Na-rich, Y-rich, or F-rich conditions.

To avoid the precipitation of secondary phases of fluoride-based compounds, relative chemical potentials should follow

$$\Delta\mu_{Na} + \Delta\mu_F \leq \Delta H^f(NaF) \quad (S8)$$

$$\Delta\mu_Y + 3\Delta\mu_F \leq \Delta H^f(YF_3) \quad (S9)$$

With DFT-calculated energies of each atom species in their bulk/gas phase and the formation enthalpy of each inorganic compound, the stability diagram of cubic NaYF<sub>4</sub> was obtained (**Fig. 1**).

Additionally, the relative chemical potential of OH species was referenced to the energy of a gas-phase, isolated OH<sup>-</sup> ion, which can be written as

$$\Delta\mu_{OH} = \mu_{OH} - \mu_{OH}^{Gas} \quad (S10)$$

Similarly, to avoid the formation of the elemental substance and the corresponding second phases, the relative chemical potential of OH species was limited by

$$\Delta\mu_{OH} \leq 0 \quad (S11)$$

$$\Delta\mu_{Na} + \Delta\mu_{OH} \leq \Delta H^f(NaOH) \quad (S12)$$

$$\Delta\mu_Y + 3\Delta\mu_{OH} \leq \Delta H^f(Y(OH)_3) \quad (S13)$$

**Table S1** Calculated formation enthalpy of each inorganic compound. Note that disordered cubic NaYF<sub>4</sub> crystal was converted to ordered tetragonal NaYF<sub>4</sub> crystal for DFT calculations.

| Compound                                | Calculated $\Delta H_f$ (eV/chemical formula) |
|-----------------------------------------|-----------------------------------------------|
| NaYF <sub>4</sub> (I41/amd)             | -22.862                                       |
| NaF (Fm3m)                              | -5.637                                        |
| YF <sub>3</sub> (Pnma)                  | -17.017                                       |
| NaOH (P2 <sub>1</sub> )                 | -4.536                                        |
| Y(OH) <sub>3</sub> (P6 <sub>3</sub> /m) | -15.324                                       |

**Table S2** Bond length between F<sup>-</sup>/OH<sup>-</sup> and its first neighboring ions in pristine/OH-incorporated unstrained cubic NaYF<sub>4</sub>. The number assigned to each atom is illustrated in **Figs. 2a** and **b**.

| Pristine lattice                |                 | OH-incorporated lattice |                 |
|---------------------------------|-----------------|-------------------------|-----------------|
| Bond name                       | Bond length (Å) | Bond name               | Bond length (Å) |
| F <sub>0</sub> -Y <sub>1</sub>  | 2.31            | O-Y <sub>1</sub>        | 2.29            |
| F <sub>0</sub> -Y <sub>2</sub>  | 2.31            | O-Y <sub>2</sub>        | 2.29            |
| F <sub>0</sub> -Na <sub>1</sub> | 2.44            | O-Na <sub>1</sub>       | 2.59            |
| F <sub>0</sub> -Na <sub>2</sub> | 2.44            | O-Na <sub>2</sub>       | 2.59            |
| F <sub>0</sub> -F <sub>1</sub>  | 2.53            | O-F <sub>1</sub>        | 2.57            |
| F <sub>0</sub> -F <sub>2</sub>  | 2.72            | O-F <sub>2</sub>        | 2.76            |
| F <sub>0</sub> -F <sub>3</sub>  | 2.97            | H-F <sub>3</sub>        | 1.81            |
| F <sub>0</sub> -F <sub>4</sub>  | 2.72            | O-F <sub>4</sub>        | 2.76            |
| F <sub>0</sub> -F <sub>5</sub>  | 2.75            | O-F <sub>5</sub>        | 2.81            |
| F <sub>0</sub> -F <sub>6</sub>  | 2.75            | O-F <sub>6</sub>        | 2.81            |
|                                 |                 | O-H                     | 0.99            |
